# Supplementary material for: Clinical relevance of T lymphocyte subsets in pediatric Graves’ disease
Source: publisher site journal article supplement (doi:10.1515/jpem-2020-0158), 2020-08-17
Supplement: Supplementary file 1 [file j_jpem-2020-0158_suppl_001.docx]

**Supplemental Table 1.** The lymphocyte subsets differences between microscopic hematuria and non-hematuria groups.

| Lymphocyte subsets | hematuria group (n=26) | non-hematuria group (n=112) | *P* values |
| --- | --- | --- | --- |
| Lymphocytes (×109/L)a | 2.81±0.88 | 2.69±0.93 | 0.577 |
| Lymphocytes (%)a | 42.39±11.69 | 42.81±12.04 | 0.878 |
| CD19+CD23+ (%)b | 12.90 (7.90-16.6) | 10.90 (8.5-13.80) | 0.223 |
| CD3+ (%)b | 66.6 (62.2-70.5) | 69.5 (61.6-73.7) | 0.404 |
| CD3+CD4+ (%)a | 35.20±5.4 | 35.70±6.8 | 0.730 |
| CD3+CD8+ (%)a | 22.90±5.6 | 24.10±5.8 | 0.398 |
| CD3-CD56+/CD16+ (%)a | 13.3±5.8 | 13.3±6.9 | 0.985 |
| CD3-CD19+ (%)a | 18.4±7.8 | 17.4±6.4 | 0.479 |
| CD4/CD8b | 1.50 (1.10-2.10) | 1.50 (1.20-1.90) | 0.771 |

aThe data were normally distributed.

bThe data were not normally distributed.
