# Supplementary material for: Clinical relevance of T lymphocyte subsets in pediatric Graves’ disease
Source: publisher site journal article supplement (doi:10.1515/jpem-2020-0158), 2020-08-17
Supplement: Supplementary file 2 [file j_jpem-2020-0158_suppl_002.docx]

**Supplemental Table 2.** The differences of serum thyroid hormones and autoantibodies concentrations between microscopic hematuria and non-hematuria groups.

| **Tests** | **hematuria group**  **(n=26)** | **non-hematuria group (n=112)** | ***P* values** |
| --- | --- | --- | --- |
| **FT3 (pg/ml)b** | 15.85 (11.96-27.00) | 13.31 (8.14-18.42) | 0.079 |
| **FT4 (ng/dl)b** | 5.47 (3.91-6.69) | 3.94 (2.83-5.59) | 0.014* |
| **TSH (uIU/ml)b** | 0.004 (0.004-0.011) | 0.007 (0.004-0.0195) | 0.147 |
| **TT3 (ng/ml)b** | 4.29 (3.10-6.57) | 3.88 (2.57-5.61) | 0.251 |
| **TT4 (ng/ml)b** | 225.90 (164.60-262.89) | 205.20 (152.35-246.75) | 0.246 |
| **TPOAb (IU/ml)b** | 501.20 (72.55-738.95) | 220.90 (71.37-634.12) | 0.709 |
| **TGAb (IU/ml)b** | 183.90 (49.20-376.50) | 91.9 (6.47-196.72) | 0.073 |
| **TRAb (U/L)b** | 18.17 (6.44-27.00) | 15.39 (7.42-29.89) | 0.956 |

*The difference of values between microscopic hematuria and non-hematuria groups were statistically significant when *P*<0.05.

aThe data were normally distributed.

bThe data were not normally distributed.

FT3, free triiodothyronine; FT4, free thyroxine; TSH, thyrotropin; TT3, total triiodothyronine; TT4, total thyroxine; TPOAb, thyroid peroxidase antibody; TGAb, thyroglobulin antibody; TRAb, TSH receptor antibody.
